# 1 **Restoring ancestral microbiome aids beetle adaptation to new diets**

2

3 Aparna Agarwal\* and Deepa Agashe\*

4

5 National Centre for Biological Sciences, Tata Institute of Fundamental Research, Bangalore, India

6

7 \*Correspondence:

8 [aagarwal@ncbs.res.in](mailto:aagarwal@ncbs.res.in)

9 [dagashe@ncbs.res.in](mailto:dagashe@ncbs.res.in)

10

## 11 **ABSTRACT**

12 Eukaryotic hosts often depend on microbes that enhance their fitness, and such relationships may be  
13 relatively easily maintained in a stable environment. What is the fate of these associations under rapid  
14 environmental change? For instance, if the host switches to a new diet and/or encounters a different  
15 microbial community, how does the host-microbiome relationship change? Are the changes adaptive,  
16 and how rapidly do they occur? We addressed these questions with the red flour beetle *Tribolium*  
17 *castaneum*, a generalist insect pest that both consumes and lives in stored grain flour. We found that  
18 beetle fitness is enhanced by flour-acquired microbes in the ancestral habitat (wheat flour), but not  
19 in novel suboptimal environments (e.g. corn flour) that have a different resident microbial community.  
20 Beetles that disperse to new habitats thus have low fitness and a dramatically altered microbiome.  
21 Enriching novel habitats with ancestral (wheat-derived) microbes increased beetle fitness, suggesting  
22 a viable adaptive strategy. Indeed, within a few generations of laboratory adaptation to two distinct  
23 novel habitats, we found that beetle populations gradually restored their ancestral microbiome.  
24 Importantly, evolved populations showed a microbe-dependent increase in fecundity and survival on  
25 the new diet. We suggest that such repeated, rapid restoration of host-microbe associations may  
26 allow generalists to successfully colonize new habitats and escape extinction despite sudden  
27 environmental changes.

28

## 29 **KEYWORDS**

30 Niche shift; Experimental evolution; Diet shift; Microbiome; Host-microbe association; Generalist

## 31 INTRODUCTION

32 Host associated microbes can be crucial for host survival [1], as exemplified by a large body of work  
33 on insect-host associations. In particular, gut-associated microbial symbionts can provide their insect  
34 hosts with limiting nutrients [2] or enhance digestion of complex compounds [3]. For instance, bacteria  
35 in the midgut of the mosquito *Aedes aegypti* help lyse red blood cells, allowing efficient nutrient  
36 absorption by the host [4]. Microbes may also aid in detoxification of the host diet, as observed in  
37 bean bugs and stink bugs, whose symbionts degrade insecticides [3, 5]. Gut bacteria can thus directly  
38 influence host fitness: administering antibiotics reduces fecundity in *A. aegypti* [4] and delays larval  
39 growth in *Anopheles stephensi* [6]; and germ-free *Drosophila* show reduced lifespan and larval growth  
40 [7].

41  
42 Such strong host-gut microbe associations are more likely to evolve in a stable environment [8],  
43 especially if microbes are transmitted across host generations. However, it is unclear whether and to  
44 what extent such insect-gut microbe interactions can be maintained when hosts experience significant  
45 environmental change within their lifetime, or across successive generations. For instance, generalist  
46 insects may feed on multiple resources in a few generations, potentially sampling a large diversity of  
47 diet-associated microbial communities. More generally, when any insect undergoes a dietary shift,  
48 both the host and its microbiome may face novel selection pressures. If the host benefits from its gut  
49 microbiome in the ancestral habitat, a dietary shift could disrupt the beneficial microbial community  
50 and reduce host fitness. In this scenario, what are the possible adaptive trajectories available to the  
51 host, and what is the effect on its microbiome?

52  
53 Broadly speaking, there are four possible impacts of a host diet shift on the microbiome (Fig 1). For  
54 each case, there are two further possibilities: the host and its microbial community may be  
55 functionally associated, or the host may only passively acquire and house the microbial community.  
56 The likelihood of each of these trajectories depends on multiple factors, such as the difference  
57 between the nutritional content and fitness consequences of the ancestral and novel diets; the  
58 difference between the diet-associated microbes in each environment; and the relative rates of  
59 adaptive mutations in the host and microbes. However, to date no studies have directly tested the  
60 impact of environmental changes on the long-term fate of host-microbiome associations. As a specific  
61 example of rapid environmental change, dietary shifts present an opportunity to address this gap.  
62 Since dietary changes are ubiquitous across insects, examining host-microbiome interactions in the  
63 context of diet shifts may also offer new insights into insect ecology and evolution.

64

65 We addressed the role of microbes in novel habitats using the flour beetle *Tribolium castaneum*, a  
66 generalist insect pest that feeds on several cereal grain flours but is best adapted to wheat flour. All  
67 life stages of *T. castaneum* consume flour and excrete their wastes in the same habitat. Thus, gut  
68 microbes can easily spread and establish within a population, and a change in the dietary resource  
69 also represents a change in the environment and associated microbes. For our experiments, we used  
70 wild-collected beetles from stored wheat to establish an outbred population that exhibits maximum  
71 fitness on wheat flour. Thus, we refer to wheat as the ancestral resource, and we used corn, finger  
72 millet and sorghum – suboptimal diets with different nutritional content (Table S1) – as novel  
73 resources. 16S rRNA amplicon sequencing showed that each resource harboured distinct bacterial  
74 communities. We measured host fitness on each resource, either in the presence of normal flour-  
75 associated microbes or after depleting microbes with UV irradiation. Finally, we experimentally  
76 evolved beetle populations in two novel resources (corn and sorghum), and tested whether their  
77 fitness depended on new or ancestral flour microbes. We demonstrate rapid, adaptive restoration of  
78 host association with ancestral (wheat-derived) microbes, paving the way to understand the  
79 mechanistic basis of such generalist host-microbe associations.

80

## 81 **METHODS**

82

### 83 **Beetle populations**

84 For all experiments, we used an outbred population of the beetle *Tribolium castaneum*, generated  
85 using adults from 12 wild-collected populations from across India. We maintained stock populations  
86 in 4-week discrete generation cycles in wheat flour procured from a single company. We kept flour  
87 bags at -80 ° C for 4 h to kill any insect eggs in the flour. After this, we allowed the bags to thaw at  
88 room temperature. We used this flour for all our experiments. Each generation, we allowed adults to  
89 oviposit for 1 week and then removed them from the flour. After 4 weeks of development, we used  
90 resulting adult offspring to start the next generation. We housed populations in round plastic boxes  
91 with 2500 to 3000 adults per generation.

92

93 For experimentally evolving populations adapting to novel resources (13 populations in corn and 12  
94 in sorghum), we founded replicate populations with 100, 200 or 500 adults at a density of 1g flour per  
95 individual (the populations were part of an independent study that required variable founding  
96 population sizes). These populations were also maintained in discrete generation cycles. Since larval  
97 development in corn is slow, we allowed corn populations 6 weeks for development, resulting in fewer

98 generations of experimental evolution in corn. Each generation, we censused the number of live adult  
99 offspring and estimated per capita population growth rate as:  $(\#Adults_t - \#Adults_{t-1}) / (\#Adults_{t-1})$ .

100

### 101 **Disrupting flour-associated microbial communities**

102 We disrupted the flour microbial community by irradiating thin layers of flour under UV light for 2 h  
103 in a laminar hood without airflow. Alternatively, we mixed flour with one of three different broad  
104 spectrum antibiotics (tetracycline, ampicillin or kanamycin, 0.005% w/w). We added single eggs or  
105 adults to treated flour in a laminar hood (in 96-well microplates, Petridishes, microcentrifuge tubes,  
106 or boxes) and stored all containers in larger airtight boxes for the duration of experiment to prevent  
107 subsequent contamination. We handled and stored control groups (with untreated flour) under  
108 identical conditions, omitting only the irradiation step.

109

### 110 **Fitness assays**

111 To successfully colonize a new environment, female fecundity and offspring survival are both critical.  
112 Therefore, to estimate fitness, we measured fecundity and egg survival in microbe depleted vs.  
113 untreated flour. To measure fecundity, we isolated 2 week old adult females in 0.7 g of sifted flour for  
114 48 h, and counted the number of eggs laid by each female (n = 25 females per treatment). To measure  
115 egg survival, we collected ~100 individuals from the stock population, and allowed them to oviposit  
116 for 24 h in 100 g sifted wheat flour (sifting with a #50 sieve removes large flour particles, making it  
117 easier to identify and count eggs). We isolated eggs in 96 well plates and provided them with flour as  
118 required for each experimental treatment (e.g. untreated vs. UV-treated flour). We counted the  
119 number of surviving offspring after 3 weeks (n = 96 eggs/treatment/block; two independent blocks  
120 per treatment).

121

122 For experimentally evolved populations, we collected 50 females after the scheduled 1-week  
123 oviposition period of the 17th generation (for sorghum adapted populations) or the 10<sup>th</sup> generation  
124 (for the corn adapted population). Recall that these females would have otherwise been discarded;  
125 hence, we did not disturb the evolving populations during these assays. The females were 2-3 weeks  
126 old at this stage, well within their peak fertility period. To measure fecundity, we isolated females and  
127 allowed them to oviposit in ~0.7 g sifted flour (untreated or UV treated corn or sorghum; n = 25  
128 females/treatment) for 48 h. To measure egg survival, we collected ~100 individuals at the 18<sup>th</sup>  
129 generation (sorghum adapted) or 11<sup>th</sup> generation (corn adapted), and allowed them to oviposit in 50  
130 g sifted flour for 24 h. We measured egg survival in the appropriate resource as described above.

131 Evolved lines that did not successfully adapt to new resources had very low population size, and hence  
132 we did not have sufficient sample size to conduct fitness assays.

133

#### 134 **Introducing microbes to UV treated flour**

135 To analyse the fitness impact of microbes associated with ancestral or evolved populations, we  
136 introduced these microbes to UV-treated sifted flour via larval fecal matter. To test the impact of  
137 ancestral microbes, we allowed ~100 larvae (~two weeks of age) from a wheat stock population to  
138 consume and defecate in UV-treated flour for 24 h. To control for microbe-independent effects of  
139 introducing the larvae, we again treated half of this flour with UV to deplete the microbial load. We  
140 then measured fecundity in either microbe-enriched or depleted treatments, as described above ( $n =$   
141 25 females/treatment). To test the impact of microbes from adapted populations, we collected adults  
142 from the sorghum adapted population at generation 8, and allowed them to oviposit in fresh sorghum  
143 flour. We collected larvae after 2 weeks and used them to introduce sorghum-associated microbes in  
144 UV-treated wheat or sorghum. Similarly, we collected adults from the corn adapted population at  
145 generation 12, allowed them to oviposit in fresh corn flour, and used 2 week old larvae to introduce  
146 corn adapted microbes in UV treated corn.

147

#### 148 **Determining bacterial community composition**

149 We determined the bacterial community associated with flour samples and beetles using amplicon  
150 sequencing of the 16S rRNA gene. For each treatment, we isolated 2-7 individuals (larvae or 1 week  
151 old adult females) and surface sterilized them using 70% ethanol, followed by a wash with DNase and  
152 RNase-free ultra-pure water. To identify flour-associated microbes, we collected four replicate  
153 samples of flour (~0.07 g each). We extracted DNA from each sample using the Promega DNA  
154 extraction kit, following the manufacturer's instructions for extracting bacterial DNA. To minimize  
155 protein contamination from beetle tissue or flour, we increased incubation time with proteinase K  
156 from 3 h to 12 h. We prepared barcoded 16S libraries by PCR amplification with standard 16S Illumina  
157 primers, and KAPA HiFi Hotstart mix. We sequenced libraries on the Illumina Miseq platform (300 bp  
158 paired end sequencing), following the Illumina protocol for further amplification and cleanup steps.  
159 We used standard QIIME pipelines [9–13] to generate tables with the relative abundance of all OTUs  
160 (Operational Taxonomic Units with 97% sequence similarity), assigning taxonomy using closed  
161 reference OTU picking with the Greengenes database [14]. We removed chloroplast or mitochondrial  
162 reads using the `filter_taxa_from_OTU_table.py` command in QIIME (Figs S1-S3). To avoid rare OTUs  
163 that may represent contamination, we removed OTUs represented by less than 20 reads. We did not  
164 get any detectable amplification in a negative control sample (ultra-pure water through the DNA

165 extraction protocol) as measured by Qubit HS assay, at all the PCR steps, suggesting that indeed  
166 contamination levels in our sequencing method are low. After this filtering, we found that some  
167 samples did not have any bacterial OTUs, and we removed these from further analysis (Table S2).  
168 Note, however, that these are also informative samples and we discuss them while presenting our  
169 results. We used the final set of samples and OTUs to re-calculate the relative abundance of each OTU  
170 per sample. We carried out all subsequent analysis in R version 3.2.2 [15].

171

172 On average, we found ~300 bacterial OTUs in flour samples and ~450 bacterial OTUs in beetle samples  
173 (Figs S1-S3). We first visualised the entire bacterial community present in each sample using an  
174 unconstrained clustering approach (Principle Co-ordinate analysis, PcoA) with the pcoa function in the  
175 R package ape v5.1 [16], and generated plots using the biplots function in the R package BiplotGUI  
176 [17]. We also used constrained clustering (ordination analysis) with the CAPdiscrim function in the  
177 BiodiversityR package [18]. To statistically test the impact of flour and resource treatments on full  
178 bacterial communities, we used PERMANOVA analyses, implemented with Adonis function in the  
179 package Vegan [19].

180

181 The full bacterial community is complex and is hence difficult to visualise. Hence, to visualize variation  
182 in the most dominant bacterial OTUs, we also analysed the five most abundant OTUs across replicate  
183 samples of a given treatment (see Fig S4 for an example). These dominant bacteria are more likely to  
184 play a functional role in the host-microbe association, since we expect beneficial bacteria to be  
185 enriched in the beetle-associated community. Note that various samples within a comparison set may  
186 not share any of their most abundant OTUs. Hence, in the final list of most abundant OTUs in a specific  
187 comparison, we could have anywhere between 5 OTUs (if all abundant OTUs were shared) and 25  
188 OTUs (if the five most abundant OTUs were unique for each group). We clubbed all bacterial OTUs  
189 that were not amongst the 5 most abundant in any sample into the category “others”.

190

## 191 **RESULTS AND DISCUSSION**

192

193 Darwin famously started his landmark paper to the Linnaean society [20] with the phrase “All nature  
194 is at war”, referring to organisms’ continued struggle for existence. However, many eukaryotes are  
195 not alone in this struggle, but rely on microbes that provide crucial fitness benefits. However, most of  
196 our understanding of such host-microbe relationships derives from studies in single environments.  
197 What happens when organisms disperse to new habitats, their microbiome is disrupted, and their  
198 microbial partners are either missing or cannot establish in the new environment?

199

200 **Beetle fitness depends on flour microbes in the ancestral, but not novel resource**

201 We first tested whether flour beetles derive a fitness benefit from their microbial flora, and whether  
202 the microbes are environmentally acquired or vertically transmitted. We disrupted the microbial  
203 community associated with the flour beetles' environment by treating flour with UV radiation, and  
204 introduced individuals to treated flour. Within 48 h, we observed a significant reduction in female  
205 fecundity in UV-treated wheat flour (Fig 2A; t-test for UV-treated vs. untreated wheat flour,  $p=0.0002$ .  
206 Similarly, across much longer timescales (3 weeks), egg survival also decreased in UV-treated wheat  
207 (Fig 2B; ChiSq test for count data,  $p = 0.003$ ), as did other fitness proxies such as adult lifespan and  
208 body mass (Fig S5; Kaplan-Meier test for lifespan:  $p < 0.01$ ; t-test for body mass,  $p < 0.01$ ). We observed  
209 a similar reduction in beetle fitness when we mixed broad-spectrum antibiotics in wheat flour (Fig  
210 S6A-B; ANOVA for the effect of antibiotics:  $p < 0.01$ , ChiSq test:  $p < 0.01$ ,  $df = 7$ ). These results suggest  
211 that flour beetle fitness depends on flour-acquired microbes that are not maternally transmitted. In  
212 contrast to the patterns in wheat, we found that UV treatment had no impact on beetle fitness in  
213 three novel resources (corn, sorghum and finger millet; t-test for each flour,  $p > 0.05$ ; Fig 2A-B), and  
214 adding Ampicillin to Sorghum flour did not alter fecundity in Sorghum (t-test for the effect of ampicillin  
215 in sorghum,  $p = 0.99$ ; Fig S6C). Thus, beetle fitness depends strongly on flour-associated environment  
216 microbes at both larval and adult life stages, but only in the ancestral wheat resource to which the  
217 hosts are well adapted.

218

219 Why is the fitness impact of flour microbes resource-dependent? One possibility is that the novel  
220 resources are so suboptimal that we could not detect a small impact of flour microbes in these assays.  
221 However, this is unlikely because beetle fitness in finger millet and sorghum is not dramatically  
222 different from that in untreated wheat (Fig 2A-B). Thus, our results probably do not reflect the  
223 strength of selection imposed by the novel environment. Another possibility is that we did not disrupt  
224 the microbial community in the novel resources sufficiently, and therefore we did not observe a fitness  
225 effect. However, 16S rRNA amplicon sequencing showed that different flours harbour distinct  
226 bacterial communities, and that UV treatment significantly disrupted the communities in each case  
227 (Fig S7; PERMANOVA:  $p_{\text{resource}} < 0.01$ ;  $p_{\text{UV}} < 0.01$ ;  $p_{\text{resource} \times \text{UV}} < 0.01$ ). Importantly, we observed similar  
228 patterns for microbiomes of beetles that fed on these resources (PERMANOVA:  $p_{\text{resource}} = 0.001$ ;  $p_{\text{UV}} =$   
229  $0.314$ ;  $p_{\text{resource} \times \text{UV}} < 0.01$ ). Individuals consuming untreated vs. UV treated flours formed distinct clusters  
230 in a linear discriminant plot (Fig 2C; see Fig S8 for unconstrained PCoA), despite substantial variation  
231 across host individuals and the lack of detectable bacterial reads in a few beetles (Table S2). The  
232 difference in microbiomes of beetles reared on different flours, and the impact of UV treatment, was

233 especially striking when we focused on dominant bacterial OTUs across treatments (Fig 2D). Finally,  
234 we observed that the microbiome of wheat-reared beetles is distinct from the microbiome of wheat  
235 flour (Fig S7; PERMANOVA:  $p_{\text{sample type}} = 0.001$ ), indicating that only specific bacteria colonize the beetle  
236 gut, and the entire flour-associated community is not passively harboured. Thus, our results show that  
237 beetle fitness depends on beneficial microbes found in wheat, and that resource-specific fitness  
238 impacts of microbes arise because the novel flours are associated with a distinct set of microbes.

239

#### 240 **Ancestral microbiome is also beneficial in novel environments**

241 Since beetles depend on wheat-derived microbes, we hypothesized that these “ancestral” microbes  
242 may also provide a fitness benefit in the novel habitats. Thus, we predicted that enriching the novel  
243 environment with wheat-associated microbes should improve beetle fitness in novel resources. To  
244 test this, we focused on corn and sorghum, which imposed low fitness relative to wheat. We briefly  
245 introduced wheat-fed larvae into each novel resource, so that the larvae would add their fecal matter  
246 to the flour and enrich it with wheat-associated microbiomes. We likely introduced very high bacterial  
247 loads through larvae because we used a large number of larvae, whose guts turn over a very high  
248 volume of food. Enriching corn and sorghum with wheat microbes caused a significant increase in  
249 fecundity (Fig 3). Importantly, beetle fecundity decreased in enriched flour treated with UV,  
250 confirming that the observed impact on fitness is due to microbial enrichment rather than other larval  
251 secretions (t-test:  $p_{UV} < 0.01$ ). Ancestral microbes also rescued egg survival in corn, although they could  
252 not rescue survival in sorghum (Fig S10). Thus, ancestral microbes could provide a fitness advantage  
253 even in novel environments, and maintenance of the ancestral microbiome could be a viable adaptive  
254 strategy after dispersal to new habitats. However, as described above the adult beetle microbiome is  
255 dramatically altered immediately after introduction to new resources (Fig 2), and it is not clear  
256 whether this challenge could be overcome during the course of adaptation to new habitats.

257

#### 258 **Gradual restoration of ancestral microbiome aids adaptation to new resources**

259 We hypothesised that co-habitation between wheat microbes and beetles for several generations may  
260 have facilitated beetle dependence on wheat microbes. We therefore predicted that as beetle  
261 populations adapt to novel environments, there may gradually enrich the ancestral microbial  
262 community, with or without beneficial microbial mutations (Fig 1). Alternatively, beetles could  
263 establish a novel relationship with corn- or sorghum-specific microbes; or adapt to the new resources  
264 independently of flour microbes. Fortunately, for an independent project, we had previously allowed  
265 replicate beetle populations to evolve under selection in corn (13 populations) or sorghum (12  
266 populations) (Fig 4A). The populations were founded with wheat-reared adult beetles, who may have



267 introduced wheat-associated microbes in the novel habitat through their fecal matter. Hence, we used  
268 these populations to distinguish between the possibilities outlined in Fig 1. Within 10-15 generations,  
269 four populations showed a clear positive growth rate (one in corn and three in sorghum; Fig 4B-C). We  
270 tested whether beetles from these “adapted” populations showed an association with flour microbes,  
271 and whether the association was beneficial. Where possible (see methods), we also analysed one  
272 population from each resource that had avoided extinction, but did not have a positive growth rate  
273 (“not adapted” populations; Fig 4B-C).

274

275 We found multiple lines of evidence suggesting that gradual restoration of ancestral (wheat-derived)  
276 microbiomes aided adaptation to novel resources. Whereas beetle fitness was unaffected by flour  
277 microbes immediately after introduction to new resources, all adapted populations derived a fitness  
278 advantage from environmental microbes (Fig 4 D-E): beetle fecundity was lower in UV treated flour  
279 (Fig 4D; pairwise t-test for each adapted population for the effect of UV treatment:  $p < 0.01$ ), and in  
280 one of the adapted sorghum populations, egg survival was also microbe-dependent (Fig 4E; ChiSq test  
281 for the effect of UV treatment. In corn,  $p > 0.05$ ; In sorghum  $p_{Anc} = 0.8$ ,  $p_{Ada(A)} < 0.01$ ). Importantly,  
282 microbiomes of beetles from adapted populations were similar to that of wheat-reared ancestors, but  
283 distinct from the bacterial community of individuals fed on sorghum or corn for a single generation  
284 (Fig 5A-B; PERMANOVA  $p_{(Ancestor(novel\ resource)\ vs.\ Adapted(novel\ resource))} = 0.003$ ;  $p_{(Ancestor(wheat)\ vs.\ Adapted(novel\ resource))}$   
285  $= 0.31$ ; see Fig S11 for PCoA). This pattern of congruence in the microbiome is especially clear if we  
286 focus on dominant bacterial taxa (Fig 5C). Conversely, in populations that did not adapt successfully,  
287 beetles harboured bacterial communities that were similar to ancestral individuals fed on the  
288 respective flour for a single generation (Fig 5A-C; PERMANOVA  $p_{(NotAdapted(novel\ resource)\ vs.\ Ancestor(novel\ resource))}$   
289  $> 0.1$  for both corn and sorghum). Finally, we found that the microbiomes of adapted populations  
290 were functionally similar to the ancestral microbiome, such that microbes from a sorghum-adapted  
291 population could rescue ancestral beetle fitness in wheat flour (Fig 5D). Microbes from sorghum or  
292 corn-adapted lines also elicited a microbe-dependent fecundity response in ancestral females exposed  
293 to the respective resource (Fig 5D, t test for the effect of reesterilizing the flour with UV:  $p_{wheat} < 0.01$ ;  
294  $p_{sorghum} = 0.006$ ;  $p_{Corn} = 0.002$ ), mimicking the effect of ancestral wheat microbiomes (although the  
295 magnitude of the effect was lower; compare Fig 5D with Fig 2). Thus, despite new mutations that  
296 probably occurred in hosts and bacteria during experimental evolution, the “evolved” host-bacterial  
297 association was effectively equivalent to the ancestral microbiome. We note that although all aspects  
298 of host fitness are not explained by the host-microbial association, it is clear that restoring ancestral  
299 partnerships with bacteria played an important role during adaptation in four independently evolved  
300 beetle populations.

301

302 **A novel yet simple adaptive path in new habitats**

303 Based on our results (summarized in Fig 6), we postulate the following trajectory of changes in host-  
304 microbiome association during adaptation. Immediately after introduction to the novel habitats, the  
305 microbiome of founding beetles shifted dramatically to reflect the bacterial community associated  
306 with the new diet. Although the founding adults also carried (and introduced) wheat-derived bacteria  
307 via their fecal matter, these bacteria were either rare or were unable to effectively colonize the beetle  
308 gut in the presence of the novel flour-associated microbes and the new diet. Thus, initially very few  
309 beetles harboured beneficial bacteria. Over generations – because individuals that harboured the  
310 bacteria also reproduced more – the abundance of the ancestral beneficial bacteria increased in the  
311 new habitat. At this stage, we could observe a dependence of beetle fitness on the flour microbes.

312

313 Our results suggest that “ecological” changes in microbial community composition may be sufficient  
314 to facilitate host adaptation to novel habitats. Although the bacteria almost certainly acquired  
315 genomic mutations during experimental evolution, our results indicate that such genetic changes may  
316 not be critical in the early stages of host adaptation. Over longer evolutionary timescales, it is possible  
317 that bacteria would acquire flour- or host population- specific beneficial mutations, such that ancestral  
318 beetles would not benefit from the microbiomes of evolved beetles. Note that although the bacterial  
319 communities associated with the wheat ancestor and the adapted populations are structurally similar,  
320 the same bacterial taxa dominated communities of beetles from non-adapted populations as well as  
321 naïve beetles fed on the novel resources for a single generation. For instance, two major bacterial  
322 genera – *Enterococcus* and *Enterobacteriaceae* – were associated with all sampled beetles (Fig 2),  
323 potentially reflecting a superior ability to colonize the beetle gut. However, mere colonization by these  
324 bacteria is not sufficient to provide fitness advantages, since beetle fitness was initially low in the  
325 novel environments. Instead, the relative and/or absolute abundances of other bacteria may also be  
326 important for host fitness. Further experiments to selectively add or eliminate specific bacteria, in  
327 combination with deep sequencing of the microbiome, are necessary to test this possibility.

328

329 Since beetles converged on similar communities in different resources, we also speculate that bacteria  
330 associated with such generalist beetles may themselves be generalists, enhancing host fitness across  
331 multiple resources. Indeed, bacteria from the genus *Enterococcus* and family *Enterobacteriaceae*  
332 (dominant taxa associated with wheat-adapted beetles) are frequently found in the guts of several  
333 insects [8] . In general, Enterococci can utilize a variety of sugars and carbohydrates; for instance, the  
334 human gut commensal *Enterococcus faecalis* can digest a wide range of plant based carbohydrates

335 such as cellulose, which humans cannot digest [21, 22]. Similarly, members of the family  
336 Enterobacteriaceae are commonly found in stored grain warehouses, and can grow on a variety of  
337 cereal grains [23]. Thus, these bacteria may have the metabolic potential to utilise multiple resources.  
338 In further work, we hope to test whether these taxa are particularly suited to colonizing the beetle  
339 gut and/or use various cereal grains, and are specifically responsible for the observed beetle-  
340 microbiome association.

341

## 342 **Conclusions**

343 We observed surprisingly rapid and repeatable restoration of ancestral microbiomes across different  
344 resources and populations, suggesting a fascinating paradigm for host evolution in new habitats. We  
345 propose that this may be a general phenomenon whereby introducing ancestral microbes can reduce  
346 the probability of host extinction in a novel environment. Conversely, host-mediated microbial  
347 dispersal may also allow bacteria to colonize diverse habitats, while significantly changing the  
348 microbial communities in new environments. Therefore, both the bacterial partners and the host may  
349 impact each other's ability to sample and colonize new environments. Our study system thus presents  
350 a unique opportunity to analyse hosts as well as their associated bacteria during the establishment of  
351 host-microbial associations.

352

## 353 **ACKNOWLEDGEMENTS**

354 We thank members of the Agashe lab for comments on the manuscript; Amruta Rajarajan, Soumya  
355 Panyam, Gaurav Agavekar and Riddhi Deshmukh for laboratory assistance; Gaurav Diwan, Kruttika  
356 Phalnikar, Umesh Mohan and Rittik Deb for help with QIIME and R analysis; and Awadhesh Pandit and  
357 other staff from the Next Generation Sequencing facility at NCBS. We acknowledge funding and  
358 support from the Wellcome Trust DBT India Alliance Fellowship (grant number IA/I/17/1/503091 to  
359 DA) and the National Centre for Biological Sciences (NCBS).

360

## 361 **AUTHOR CONTRIBUTIONS**

362 Conceived and designed experiments: DA, AA. Conducted experiments: AA. Analysed data: AA, DA.

363 Wrote the manuscript: DA, AA. Acquired funding: DA.

364

365

366 **REFERENCES**

367

- 368 1. Engel, P., and Moran, N. (2013). Functional and evolutionary insights into the simple yet specific gut  
369 microbiota of the honey bee from metagenomic analysis. *Gut Microbes* 4, 60–65.
- 370 2. Wilkinson, TL, and Douglas, AE (1996). The impact of aposymbiosis on amino acid metabolism of  
371 pea aphids. *Entomologia Experimentalis et Applicata*.  
372 Available at: <http://onlinelibrary.wiley.com/doi/10.1111/j.1570-7458.1996.tb00935.x/full>.
- 373 3. Kikuchi, Y., Hayatsu, M., Hosokawa, T., Nagayama, A., Tago, K., and Fukatsu, T. (2012). Symbiont-  
374 mediated insecticide resistance. *P Natl Acad Sci Usa* 109, 8618–22.
- 375 4. Terenius, O., Lindh, J., Eriksson-Gonzales, K., Bussière, L., Laugen, A., Bergquist, H., Titanji, K., and  
376 Faye, I. (2012). Midgut bacterial dynamics in *Aedes aegypti*. *Fems Microbiol Ecol* 80, 556–65.
- 377 5. Werren, J. (2012). Symbionts provide pesticide detoxification. *Proc Natl Acad Sci* 109, 8364–8365.
- 378 6. Gendrin, M., Rodgers, F., Yerbanga, R., Ouédraogo, J., Basáñez, M.-G., Cohuet, A., and Christophides,  
379 G. (2015). Antibiotics in ingested human blood affect the mosquito microbiota and capacity to  
380 transmit malaria. *Nat Commun* 6, 5921.
- 381 7. Ridley, E., Wong, A., Westmiller, S., and Douglas, A. (2012). Impact of the resident microbiota on  
382 the nutritional phenotype of *Drosophila melanogaster*. *Plos One* 7, e36765.
- 383 8. Engel, P., and Moran, N. (2013). The gut microbiota of insects – diversity in structure and function.  
384 *Fems Microbiol Rev* 37, 699–735.
- 385 9. Wang, Q, Garrity, GM, and T.-J. (2007). Naive Bayesian classifier for rapid assignment of rRNA  
386 sequences into the new bacterial taxonomy. *Applied and Environmental Microbiology*  
387 Available at: <http://aem.asm.org/content/73/16/5261.short>.
- 388 10. Edgar, R. C. (2010). Search and clustering orders of magnitude faster than BLAST. *Bioinformatics*  
389 26, 2460–2461.
- 390 11. McDonald, D, Price, MN, Goodrich, J, and, N.-E. (2012). An improved Greengenes taxonomy with  
391 explicit ranks for ecological and evolutionary analyses of bacteria and archaea. *The ISME journal*  
392 Available at: <https://www.nature.com/articles/ismej2011139>.
- 393 12. Caporaso, J., Kuczynski, J., Stombaugh, J., Bittinger, K., Bushman, F., Costello, E., Fierer, N., Peña,  
394 A., Goodrich, J., Gordon, J., et al. (2010). QIIME allows analysis of high-throughput community  
395 sequencing data. *Nat Methods* 7, nmeth.f.303.
- 396 13. Caporaso, JG, Bittinger, K, and B.-F. (2009). PyNAST: a flexible tool for aligning sequences to a  
397 template alignment.  
398 Available at: <https://academic.oup.com/bioinformatics/article-abstract/26/2/266/209568>.
- 399 14. DeSantis, TZ, Hugenholtz, P, and L.-N. (2006). Greengenes, a chimera-checked 16S rRNA gene  
400 database and workbench compatible with ARB. *Applied and Environmental Microbiology*  
401 Available at: <http://aem.asm.org/content/72/7/5069.short>.
- 402 15. R Core team(2013). R: A language and environment for statistical computing.  
403 Available at: <https://www.R-project.org/>
- 404 16. Paradis, E, Blomberg, S, Bolker, B.-J. (2004). APE: analyses of phylogenetics and evolution in R  
405 language. *Bioinformatics*  
406 Available at: <https://cran.stat.unipd.it/web/packages/ape/ape.pdf>.
- 407 17. Grange, L. A., le Roux, N, and Software, G.-L.-S. (2009). BiplotGUI: interactive biplots in R Statistical  
408 Software.  
409 Available at: <https://core.ac.uk/download/pdf/6303184.pdf>.
- 410 18. Kindt, R., and Coe (2005). Tree diversity analysis. A manual and software for common statistical  
411 methods for ecological and biodiversity studies. World Agroforestry Centre (ICRAF), Nairobi. ISBN 92-  
412 9059-179-X.

- 413 19. Oksanen, J., Blanchet, G. F., Kindt, R., Legendre, P., Minchin, P. R., O'hara, RB, Simpson, G. L.,  
414 Solymos, P., Stevens, H. M., and Wagner, H. (2013). Package 'vegan'. Community ecology package,  
415 version 2.
- 416 20. Darwin, C, and Wallace, A (1858). On the tendency of species to form varieties; and on the  
417 perpetuation of varieties and species by natural means of selection. Zoological Journal of the Linnean  
418 Society  
419 Available at: <http://onlinelibrary.wiley.com/doi/10.1111/j.1096-3642.1858.tb02500.x/full>.
- 420 21. Robert, C, and microbiology ecology, B.-A. (2003). The cellulolytic microflora of the human colon:  
421 evidence of microcrystalline cellulose-degrading bacteria in methane-excreting subjects. FEMS  
422 microbiology ecology.  
423 Available at: [http://onlinelibrary.wiley.com/doi/10.1016/S0168-6496\(03\)00207-1/full](http://onlinelibrary.wiley.com/doi/10.1016/S0168-6496(03)00207-1/full).
- 424 22. Gilmore, M. S., Clewell, D. B., Ike, Y., and Shankar, N. (2014). The Physiology and Metabolism of  
425 Enterococci--Enterococci: From Commensals to Leading Causes of Drug Resistant Infection.
- 426 23. Olstorpe, M., Schnürer, J., and Passoth, V. (2012). Growth inhibition of various Enterobacteriaceae  
427 species by the yeast *Hansenula anomala* during storage of moist cereal grain. Applied and  
428 environmental microbiology 78, 292–4.  
429  
430

431 **FIGURES**

432

433 **Figure 1: Possible impacts of a host diet shift on the composition and genetic makeup of the host-**  
 434 **associated microbial community.** Note that although microbes will most certainly acquire mutations  
 435 during the course of the host diet shift, here we only refer to mutations that affect host fitness.

436

437

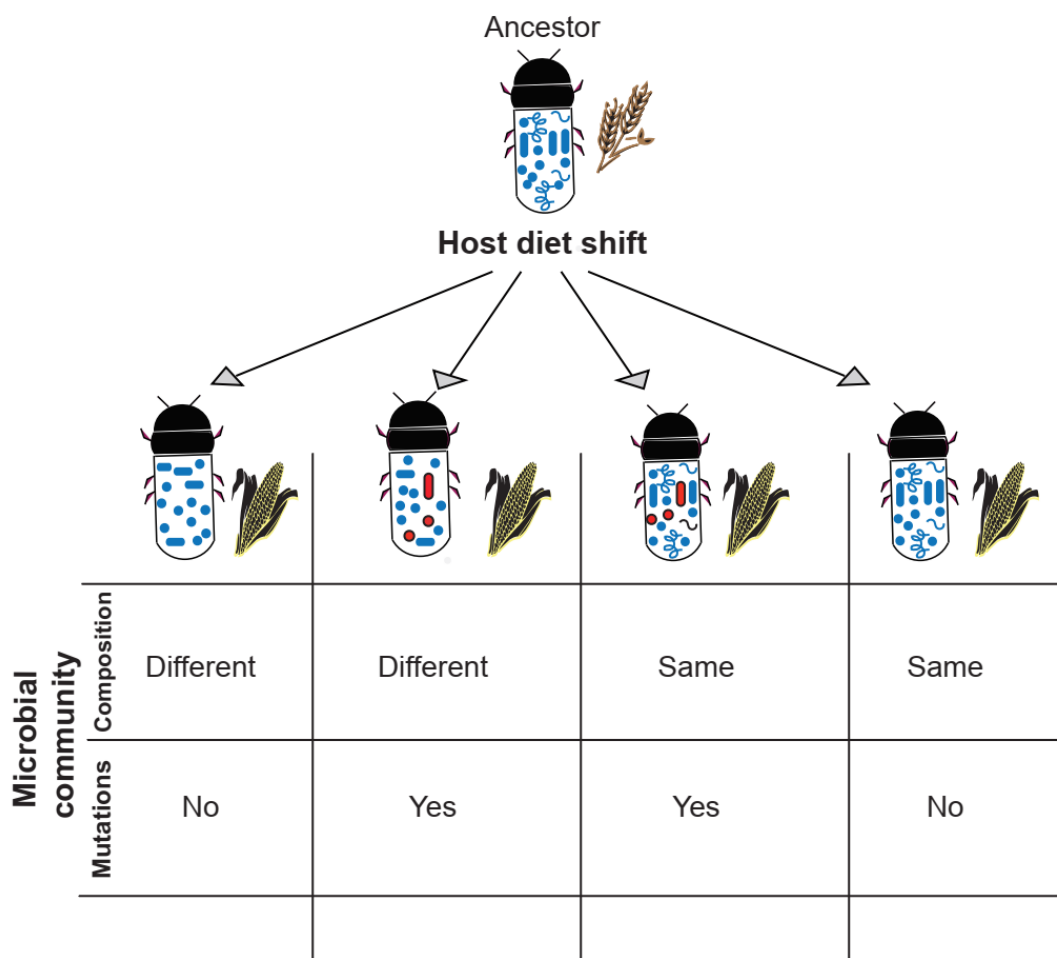

438

439 **Figure 2: Flour beetle fitness depends on flour-associated microbes in the ancestral resource.** Each  
440 panel includes a schematic representation of relevant experiments. **(A)** Fecundity (number of eggs laid  
441 per female; n = 25 females per treatment) in untreated or UV-treated ancestral (wheat) or novel  
442 resources (finger millet, corn and sorghum). Boxplots show the median number of eggs laid in each  
443 treatment (boxes indicate inter quartile length (IQL) and whiskers indicate 1.5x IQL). Raw data points  
444 are shown as open squares. Asterisks indicate a significant difference between untreated and UV-  
445 treated resource. **(B)** Average fraction of surviving offspring after 3 weeks of development in each  
446 resource (n = 96 stock-collected eggs per treatment per block; 2 blocks per treatment; open circles  
447 show the fraction of survival/treatment for each independent block. Asterisks indicate a significant  
448 difference between untreated and UV-treated resource. **(C)** Linear discriminant (LD) analysis of the  
449 complete bacterial communities associated with individuals reared on different resources. LD1 and  
450 LD2 are the first two discriminants that best capture the classification of the different groups; percent  
451 variation explained is given in parentheses. Each filled circle represents an individual beetle, and  
452 ellipses indicate 95% confidence intervals. **(D)** Dominant bacterial community members associated  
453 with beetles fed on different flours. Stacked bar plots show the average relative abundance of the 5  
454 most abundant bacterial OTUs from individual beetles (sample size is given above each bar). OTUs  
455 were classified to the lowest taxonomic level possible, indicated in parentheses (o=order, f=family,  
456 g=genus). Numbers after OTU names distinguish OTUs with the same taxonomic classification that  
457 were distinct at sequence level (97% identity).  
458  
459  
460  
461

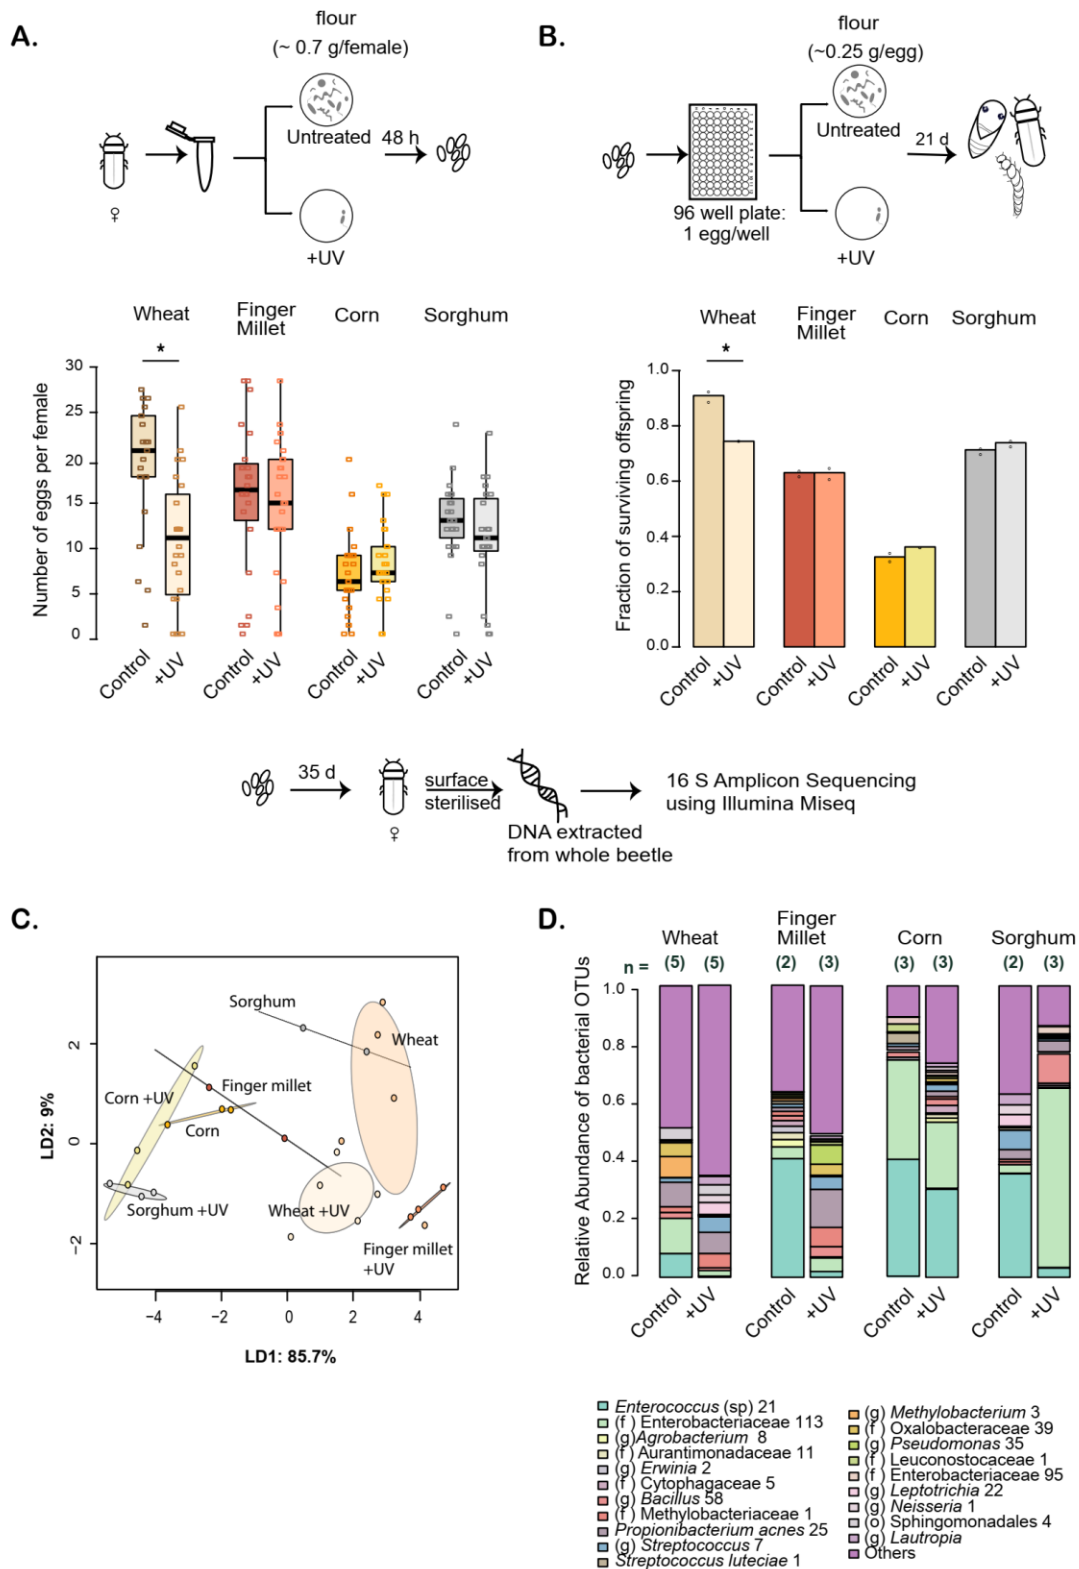

462

463



464

465 **Figure 3. Introducing ancestral microbes in novel resources increases fecundity.** Boxplots show the  
466 median number of eggs laid in flour enriched with wheat microbes, or in enriched flour after further  
467 UV treatment (see schematic on top; +Wh = wheat microbes; n = 25 females per treatment; boxplots  
468 and raw data are shown as described in Fig 2). Asterisks indicate a significant difference between  
469 untreated and UV-treated resource.

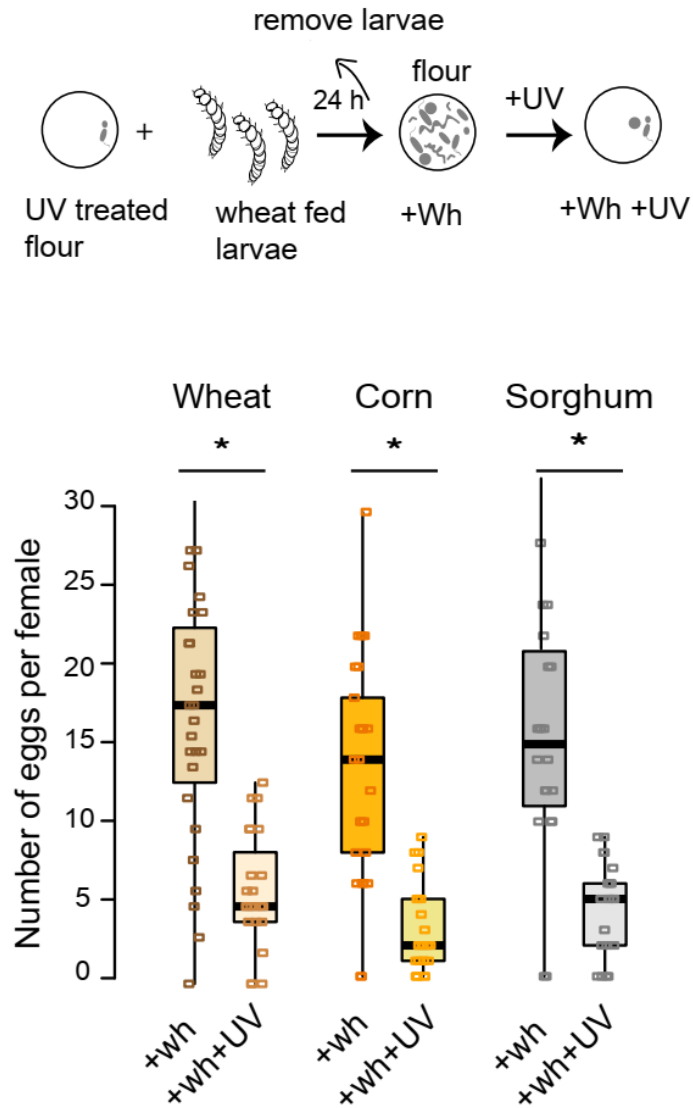

470

471 **Figure 4. Fitness of beetles adapted to novel resources depends on flour-associated microbes.** (A) A  
 472 schematic representation of the experimental evolution regime. (B and C) Number of adults per  
 473 population across generations, for adapted populations (black) and one population that did not  
 474 successfully adapt (red), for (B) corn and (C) sorghum. (D) Fecundity ( $n = 25$  females per treatment) in  
 475 untreated vs. UV-treated flour for ancestral females (“Anc”: fed on the novel resource for a single  
 476 generation), or for females from populations that had adapted to the novel resource (“Ada”). Boxplots  
 477 and raw data are shown as described in Fig 2. Asterisks indicate a significant difference between  
 478 untreated and UV-treated resource. (E) Fraction of surviving offspring after 3 weeks of development  
 479 in untreated or UV-treated flour ( $n = 96$  stock-collected eggs per treatment), for eggs derived from  
 480 ancestral or adapted populations as above. Asterisks indicate a significant difference between  
 481 untreated and UV-treated resource.

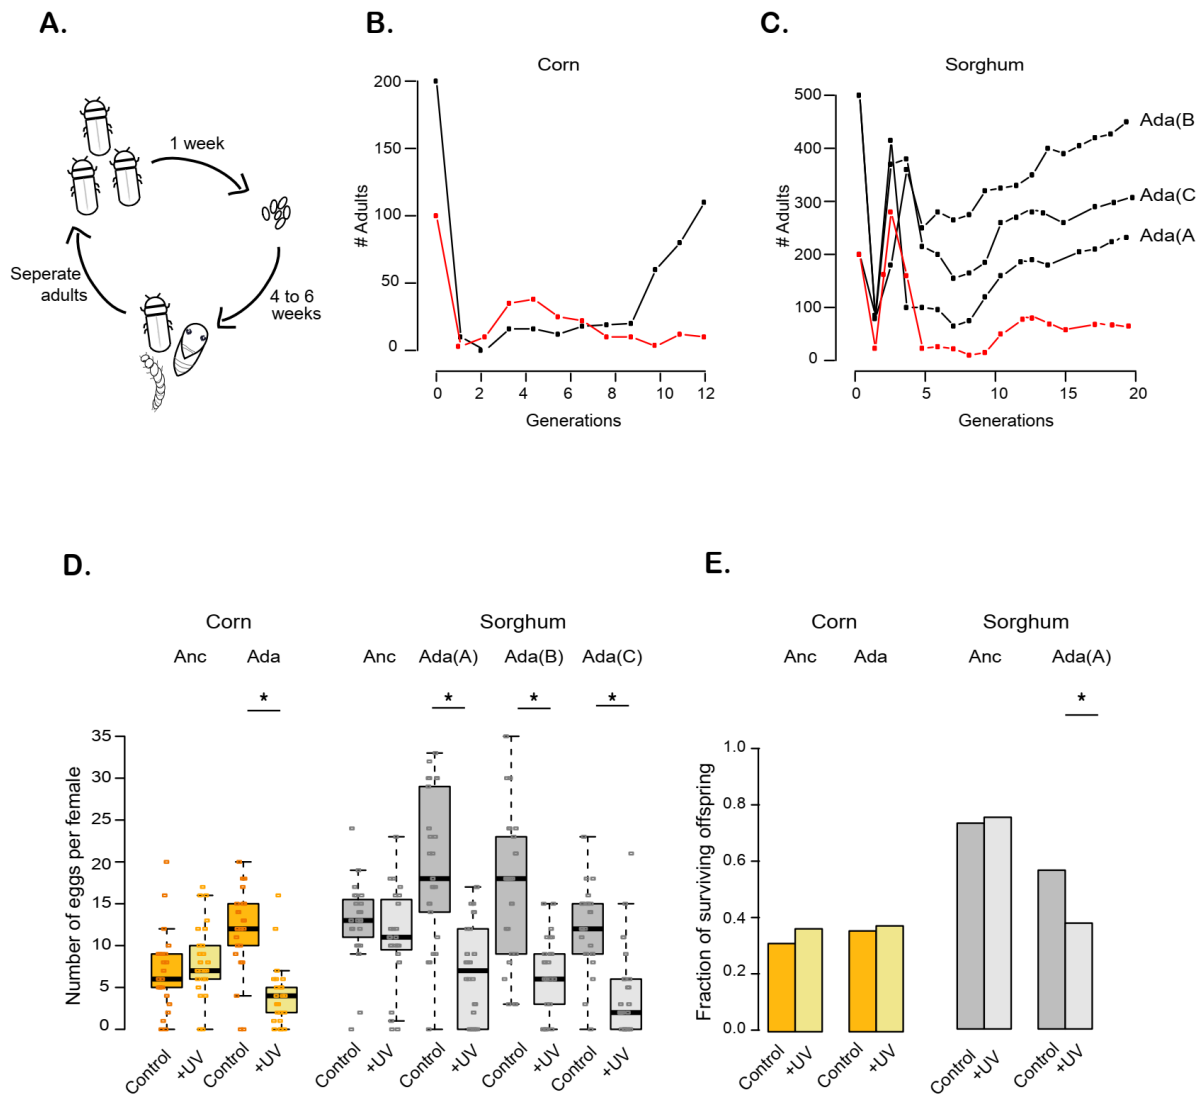

482

483 **Figure 5: Beetles from adapted populations converge on the ancestral wheat-associated**  
484 **microbiome. (A, B)** Linear discriminant analysis for full bacterial communities associated with  
485 individuals from adapted vs. not adapted populations, including wheat-fed ancestral individuals (panel  
486 A: corn; B: sorghum). Discriminants LD1 and LD2 best capture the classification of different groups, as  
487 indicated by the percent variation explained by each. Filled circles indicate individual beetles and  
488 ellipses show 95% confidence intervals. **(C)** Dominant members of the bacterial community of beetles  
489 from adapted vs. not adapted populations, and their respective ancestors. Stacked bar plots show the  
490 average relative abundance of the five most abundant bacterial OTUs in individual beetles (sample  
491 size indicated above bars) fed on untreated or UV treated flour. OTUs were classified to the lowest  
492 taxonomic level possible, indicated in parentheses (o=order, f=family, g=genus). Numbers after OTU  
493 names distinguish OTUs with the same taxonomic classification. **(D)** The impact of microbes from corn  
494 (Co-Ad) or sorghum-adapted (So-Ad) populations on the fecundity of wheat-adapted females (n = 25  
495 females per treatment; see schematic on top). The left panel shows fecundity after 24 h in sorghum  
496 or wheat flour enriched with microbes from a sorghum adapted population (So-Ad), vs. enriched flour  
497 that was again treated with UV (So-Ad+UV). The right panel shows fecundity measured after 48 h in  
498 corn flour enriched with microbes from the corn adapted population (Co-Ad), vs. in enriched flour  
499 treated with UV (Co-Ad+UV). Boxplots and raw data are shown as described in Fig 2. Asterisks indicate  
500 a significant difference between untreated and UV-treated resource.

501

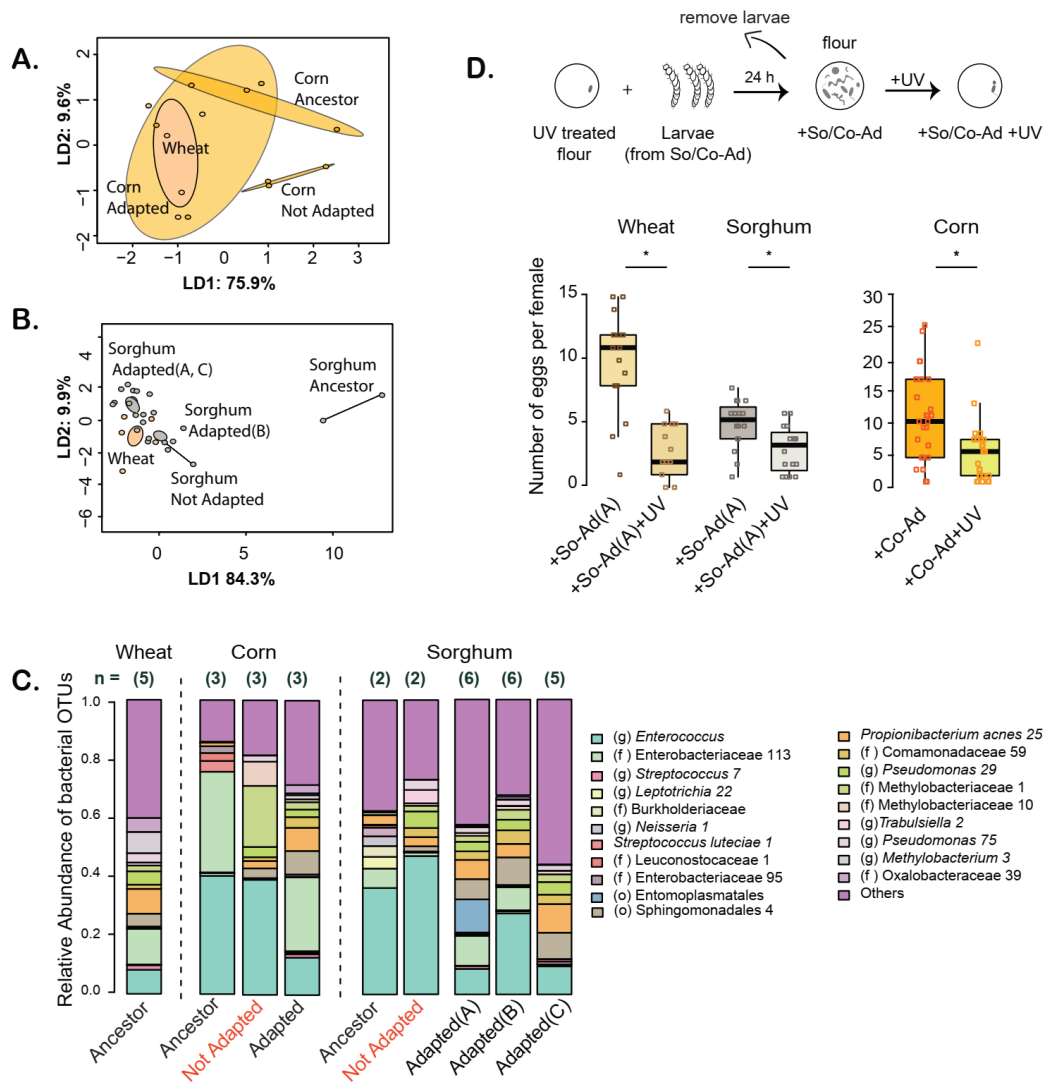

502

503

504

505 **Figure 6: Summary of patterns of change in host dependence on microbes during experimental diet**

506 **shifts.** “+” signs indicate relative fitness of beetles in each resource, with or without access to flour-

507 associated microbes (as indicated by bacteria inside beetles). Instances where we observed a

508 significant microbe dependent fitness decline are highlighted in pale green (based on pairwise

509 comparison between beetles with normal vs. depleted microbial loads). Empty cells indicate missing

510 data.

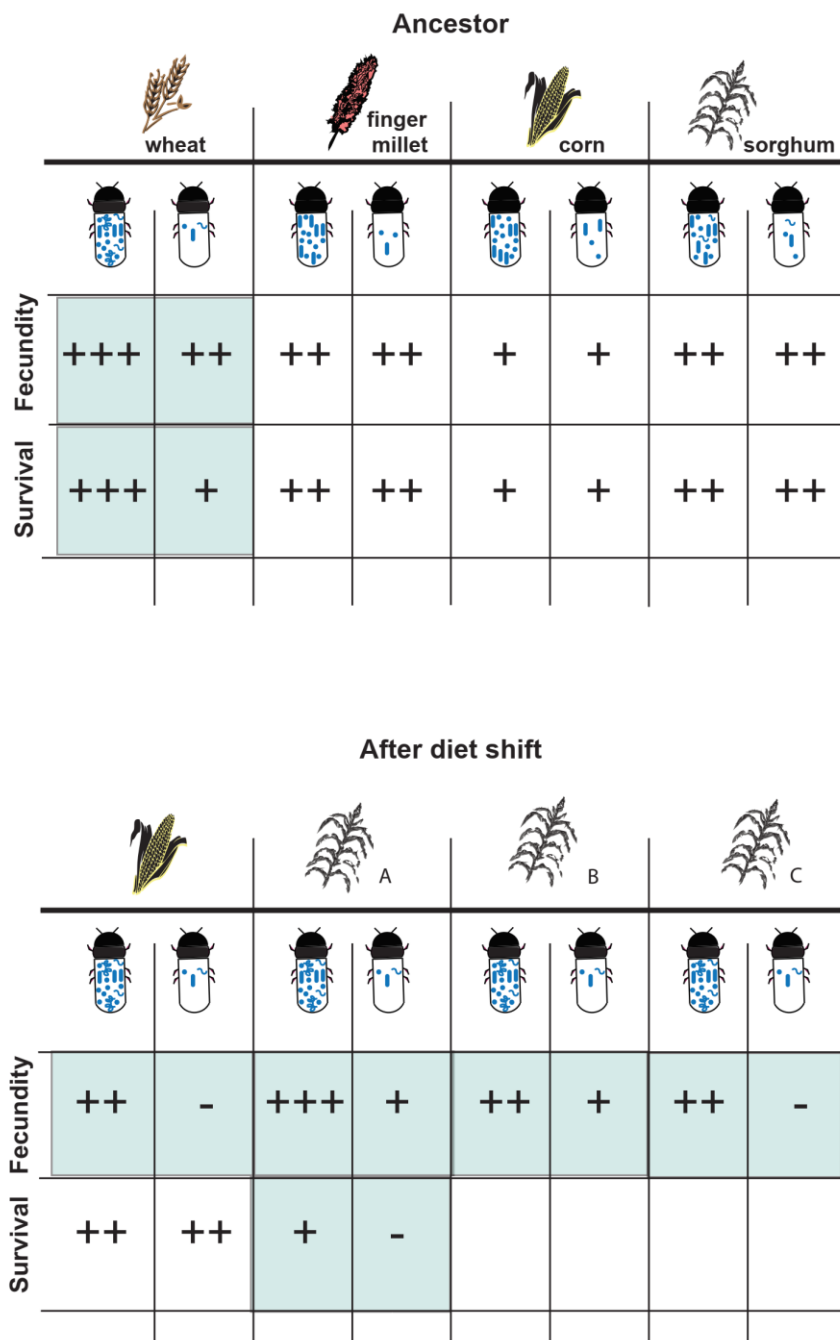

511
